# Supplementary material
Source: Springer Nature journal article supplement (https://www.springermedizin.de/resource/supplementary/12958_2008_476_MOESM1_ESM.pdf/9568188)

A

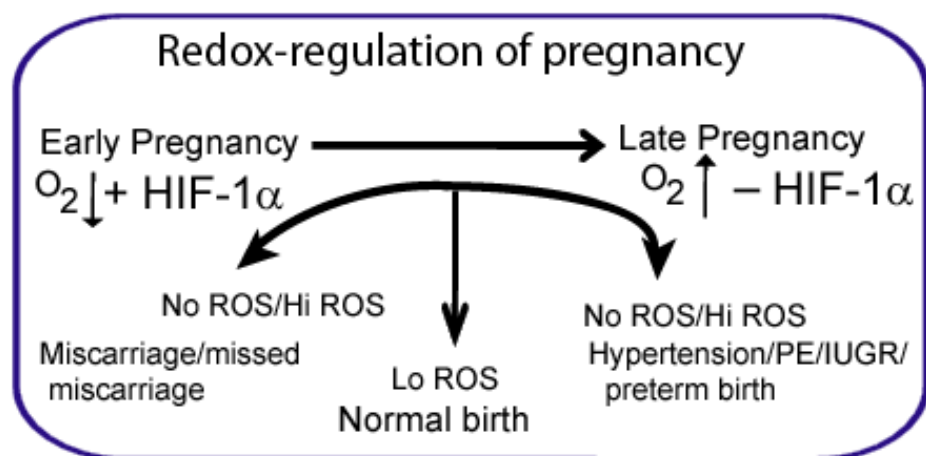

B

### Temporal regulation of HIF-1 $\alpha$ by 2ME2 during pregnancy

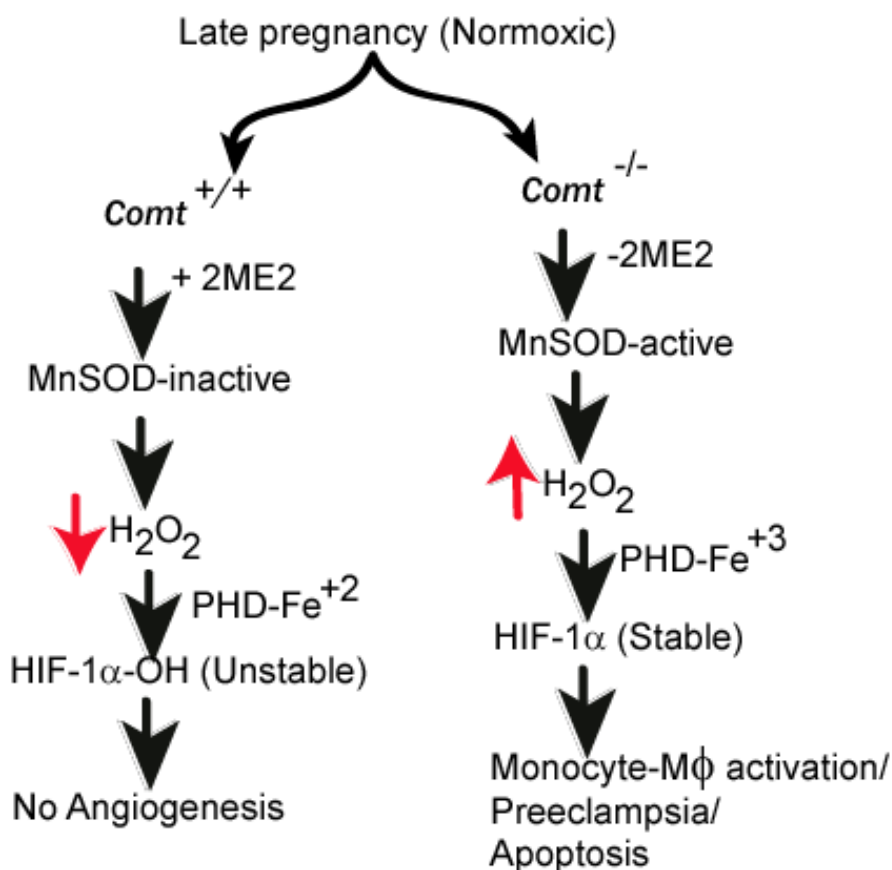

Supplement: MOESM1 [file 9568188]
